# Supplementary material
Source: Elsevier journal article supplement (https://www.sciencedirect.com/science/article/pii/S2255553615001330)
Supplement: mmc1 [file S2255553615001330:mmc1.pdf]

## Anexo 1. Questionário BISQ

Por favor, marque apenas uma opção quando você responder às questões que apresentam mais de uma opção de resposta.

Nome do entrevistado: \_\_\_\_\_

Data: \_\_\_\_\_

Parentesco do entrevistado: ☐ Pai, ☐ Mãe, ☐ Avó/Avô, ☐

Outro (especificar) \_\_\_\_\_

Nome da criança: \_\_\_\_\_ Data de nascimento: \_\_\_\_\_

Sexo: ☐ Masculino, ☐ Feminino

Ordem de nascimento da criança: ☐ Mais velho, ☐ Do meio, ☐ Mais novo

Organização para dormir:

☐ Berço em um quarto separado

☐ Berço no quarto dos pais

☐ Na cama dos pais

☐ Berço no quarto com irmãos

Outro (especificar): \_\_\_\_\_

Em que posição seu(sua) filho(a) dorme na maior parte das vezes?

☐ Barriga para baixo

☐ De lado

☐ De costas

Quanto tempo seu(sua) filho(a) passa dormindo durante a NOITE (entre as 7 da noite e as 7 da manhã)?

Horas: \_\_\_\_\_ Minutos: \_\_\_\_\_

Quanto tempo seu(sua) filho(a) passa dormindo durante o DIA (entre as 7 da manhã e as 7 da noite)?

Horas: \_\_\_\_\_ Minutos: \_\_\_\_\_

Média de vezes em que seu(sua) filho(a) acorda por noite:

\_\_\_\_\_  
Durante a noite (entre 10 da noite e as 6 da manhã) quanto tempo seu(sua) filho(a) permanece acordado(a)?

Horas: \_\_\_\_\_ Minutos: \_\_\_\_\_

Quanto tempo você leva para fazer seu(sua) filho(a) adormecer à noite?

Horas: \_\_\_\_\_ Minutos: \_\_\_\_\_

Como o seu bebê adormece?

☐ Sendo alimentado

☐ Sendo embalado

☐ No colo

☐ Sozinho na cama

☐ Na cama perto dos pais

A que horas normalmente seu(sua) filho(a) adormece à noite?

Horas: \_\_\_\_\_ Minutos: \_\_\_\_\_

Você considera o sono de seu(sua) filho(a) um problema?

☐ Um problema muito grave

☐ Um problema pouco grave

☐ Não considera um problema

Fonte: Figura traduzida/adaptada de Nunes et al.<sup>19</sup>
